# Supplementary material for: A facile fluorescence method for the effective detection of ampicillin using antioxidant carbon dots with specific fluorescent response to ˙OH
Source: Royal Society of Chemistry journal article supplement (doi:10.1039/d4an00561a), 2024-01-01
Supplement: d4an00561a1.pdf [file d4an00561a1.pdf]

## **A facile fluorescence method for the effective detection of ampicillin using antioxidant carbon dots with specific fluorescent response to ·OH**

Xiaoqin Deng<sup>a</sup>, Menghan Zhang<sup>a</sup>, Yao Wang<sup>a</sup>, Chenfang Miao<sup>a</sup>, Yanjie Zheng<sup>a</sup>, Jiyue Huang<sup>b</sup>, Yongzhong Chen<sup>b,\*</sup>, Shaohuang Weng<sup>a,\*</sup>

a. Department of Pharmaceutical Analysis, School of Pharmacy, Fujian Medical University, Fuzhou 350122, P. R. China

b. The 900th Hospital of Joint Logistics Team of the PLA, Fuzhou General Clinical Medical College of Fujian Medical University, Fuzhou, 350025, China

Correspondence: [shweng@fjmu.edu.cn](mailto:shweng@fjmu.edu.cn) (S. Weng), [cyzhong3609@163.com](mailto:cyzhong3609@163.com) (Y. Chen)

### **S1. Experimental sections**

#### **S1.1. Reagents and apparatus**

Citric acid, ethylenediamine, 2,2'-Azinobis (3-ethylbenzothiazoline-6-sulfonic Acid Ammonium Salt) (ABTS), sodium chloride (NaCl), zinc chloride (ZnCl<sub>2</sub>) and streptomycin (SM) were purchased from Aladdin Biochemical Technology Co., (Shanghai, China). Erythromycin (EM), vancomycin (VA), chloramphenicol (CPL), ampicillin (AMP), penicillin G (PG) and 2,2-diphenyl-1-pyridine hydrazyl (DPPH) were provided by Macklin Biochemical Co., (Shanghai, China). 30% hydrogen peroxide solution (H<sub>2</sub>O<sub>2</sub>) was purchased from Xilong Science Co., (Shantou, China). Iron (II) sulfate heptahydrate (FeSO<sub>4</sub>·7H<sub>2</sub>O), calcium chloride (CaCl<sub>2</sub>), magnesium chloride (MgCl<sub>2</sub>), potassium chloride (KCl) and glucose were purchased from Sinopharm Chemical Reagent Co., (Shanghai, China).

Ultraviolet-visible absorption spectra were recorded with UV-2450 spectrophotometer (Shimadzu Corporation, Japan). Fourier transform infrared spectroscopy (FTIR) was collected by NICOLET iS50 Infrared Spectroscopy (Thermo Fisher Scientific, USA). Water contact angle was determined using Theta Lite optical contact angle meter (Biolin scientific, Sverige). Transmission electron microscopy (TEM) images were performed on a FEI Talos F200S (Thermo Fisher Scientific, USA). Fluorescence spectra were recorded on Cary Eclipse fluorescence spectrophotometer (Agilent Technologies, USA).

#### **S1.2. Quantum yield (QY) measurement**

The relative fluorescence quantum yield of E-CDs (QY<sub>E-CDs</sub>, Ex=345 nm) was calculated

using quinine sulfate ( $Q_s=54.6\%$ ) in 0.1 mol/L  $H_2SO_4$  solution as a reference. The absorbance of the aqueous solution of E-CDs with quinine sulfate was measured at 350 nm, and the absorbance value of the solution was kept below 0.05 to minimize self-absorption. And the fluorescence spectra of the above solutions were determined at 350 nm excitation. The  $QY_{E-CDs}$  were calculated using the following equation.

$$QY_{E-CDs} = QY_{Qs} \frac{K_{E-CDs} \left( \frac{\eta_{E-CDs}}{\eta_{Qs}} \right)^2}{K_{Qs}}$$

$QY_{E-CDs}$  and  $QY_{Qs}$  are the quantum yields of E-CDs and quinine sulfate, respectively.  $\eta$  is the refractive index (1.33 for water and 0.1 M  $H_2SO_4$ ).  $K$  is the slope of the integrated fluorescence intensity-absorbance curve.

### S1.3. Measurement of ESR

Verification of the reaction between AMP and  $\bullet OH$  was conducted using electron paramagnetic resonance spectroscopy. 1.4 mL of PBS, 200  $\mu L$  of  $FeSO_4$  (5  $\mu M$ ), 200  $\mu L$  of  $H_2O_2$  (500  $\mu M$ ) and 200  $\mu L$  of AMP (50  $\mu g/mL$ ) were mixed. After incubation for 4 or 16 minutes, the EPR spectra were measured by adding DMPO.

The Stern-Volmer equation of  $F_0/F=1+K_{sv}[Q]$  was used to observe the change of the quenching constant after the temperature of the reaction system increased<sup>1</sup> (where  $F_0$  and  $F$  are the fluorescence intensity of the fluorescence substance without and with the quenching agent, respectively;  $[Q]$  is the concentration of quencher;  $K_{sv}$  is the dynamic quenching constant).

## S2. Supplementary Figures

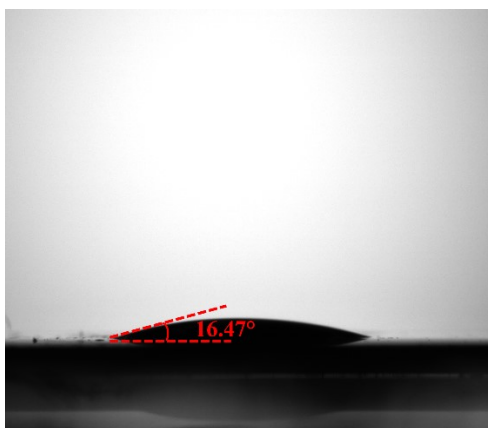

Fig. S1. The water contact angle of the E-CDs

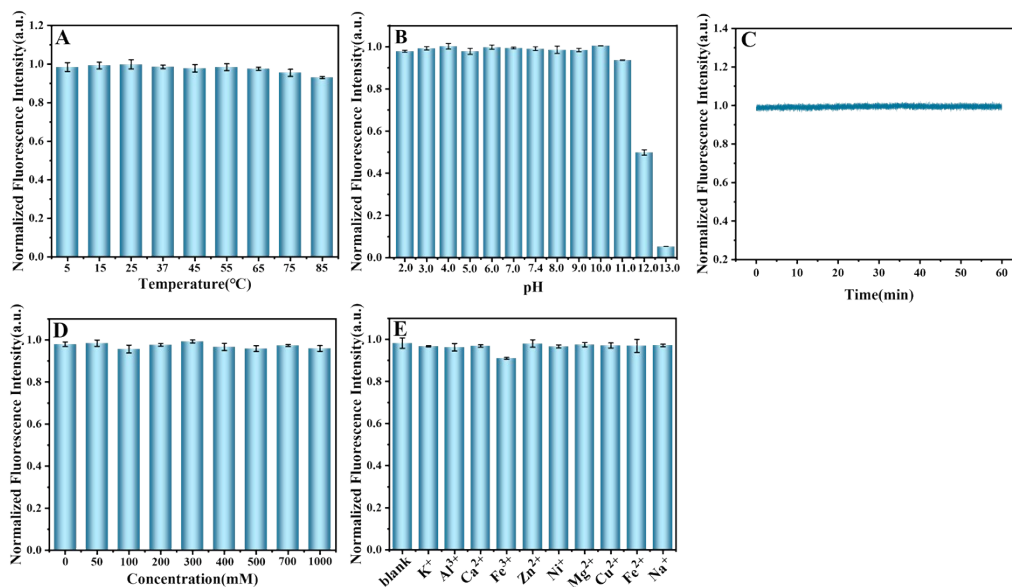

Fig. S2. Fluorescence responses of E-CDs at different temperatures (A), variable pH values(B), continuous exciting at 350 nm for 1 hour (C), different NaCl concentrations (D), and to different metal ions (E).

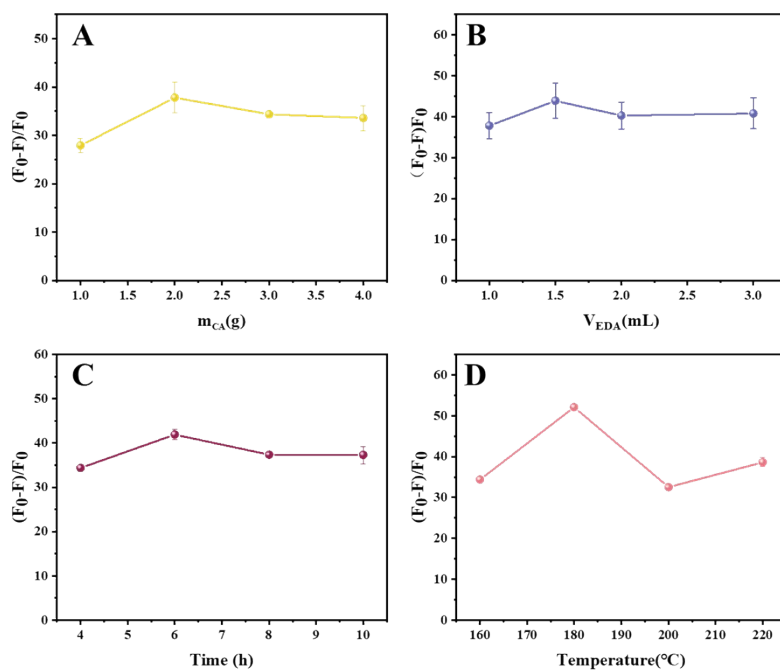

Fig. S3. The response capability of CDs synthesized with different citric acid content (A), different ethylenediamine content (B), different reaction time (C), and different reaction temperature (D) to •OH.

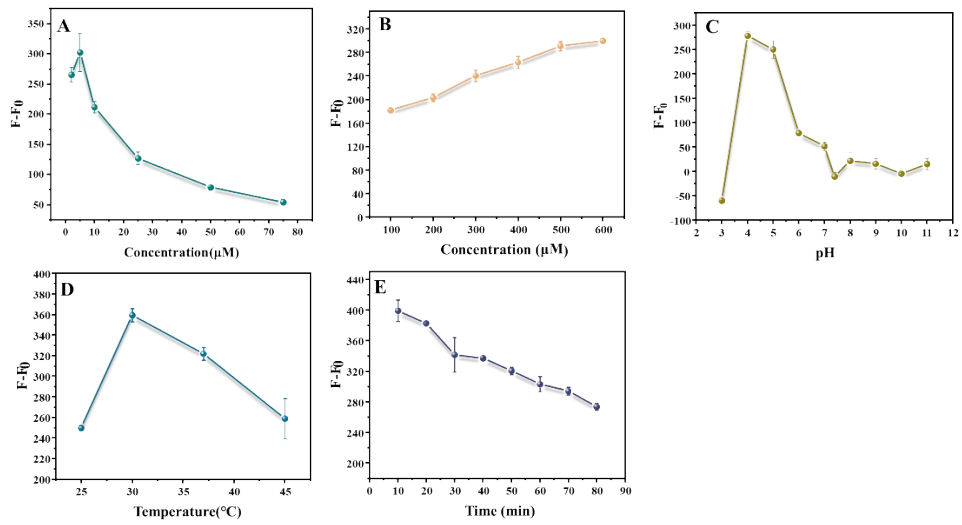

Fig. S4. The effects of  $\text{Fe}^{2+}$  concentration (A), different  $\text{H}_2\text{O}_2$  concentrations (B), pH (C), reaction temperature (D), and reaction time (E) on  $F-F_0$ .

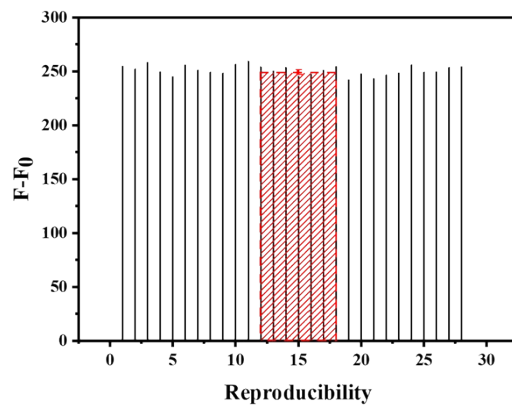

Fig. S5. The repeatability of the detection method ( $n=28$ ).

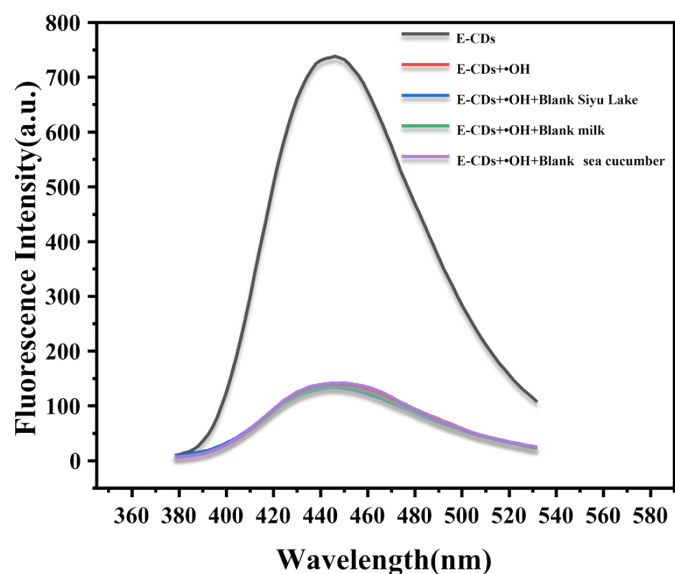

Fig. S6. Fluorescence spectra of the E-CDs+H<sub>2</sub>O<sub>2</sub>+Fe<sup>2+</sup> system after reacting with Siyu Lake water, milk, and sea cucumber samples with the same treatment before the addition of AMP.

### S3. Supplementary Tables

Table S1 QY of different antioxidant CDs

| Sample   | $\lambda_{ex}$ (nm) | QY(%) | References |
|----------|---------------------|-------|------------|
| E-CDs    | 350                 | 81.87 | This work  |
| Se-CDs   | 379                 | 7.10  | 2          |
| R-CDs    | 560                 | 14.00 | 3          |
| L-CDs    | 370                 | 10.00 | 4          |
| Se-CDs   | 360                 | 8.30  | 5          |
| ASAC-CDs | 353                 | 3.17  | 6          |
| C1CQDs   | 440                 | 28.40 | 7          |

Table S2 Comparison of the performance of AMP sensors with other sensors and this work

| Probe            | LOD ( $\mu\text{g/mL}$ ) | Detection range( $\mu\text{g/mL}$ ) | Reference |
|------------------|--------------------------|-------------------------------------|-----------|
| EuNS             | 1.74                     | 0-17.43                             | 8         |
| Ni <sup>2+</sup> | 0.52                     | 17.47-69.88                         | 9         |
| CDs              | 0.24                     | 0-20.96                             | 10        |
| CND              | 5.81                     | 6.6-200                             | 11        |
| AuNPs            | 13.00                    | 16-96                               | 12        |
| AgNPs            | 0.01                     | 0.025-1.2                           | 13        |
| E-CDs            | 0.38                     | 0.5-20 and 20-80                    | This work |

Table S3 Testing results of ampicillin capsules(n=3)

| AMP (μg/mL) | Specifications (mg/grain) | Tested result (μg/mL) | Tested result (mg/grain) | Labeled percentage (%) | RSD (n=3, %) |
|-------------|---------------------------|-----------------------|--------------------------|------------------------|--------------|
| 6           | 250                       | 5.95                  | 247.99                   | 99.20                  | 0.39         |
| 10          |                           | 9.89                  | 247.28                   | 98.91                  | 0.64         |

### Supplementary References

- 1 M. H. Tai, J. Y. Wang, Z. K. Yu, Q. W. Wang, Q. Wu, J. H. Guo, Y. C. Cheng, D. L. Jin and L. C. Wang, *Microchem. J.*, 2023, **193**, 7.
- 2 D. L. Zhou, H. Huang, J. R. Yu and Z. M. Hu, *Microchim. Acta*, 2021, **188**, 8.
- 3 Y. L. Xu, C. Wang, L. Z. Sui, G. X. Ran and Q. J. Song, *J. Mater. Chem. C*, 2023, **11**, 2984-2994.
- 4 D. Yang, L. Li, L. Cao, Z. M. Chang, Q. Mei, R. H. Yan, M. F. Ge, C. Y. Jiang and W. F. Dong, *Materials*, 2020, **13**, 10.
- 5 H. Huang, Z. F. Shen, B. Y. Chen, X. Y. Wang, Q. N. Xia, Z. G. Ge, Y. G. Wang and X. Li, *J. Colloid Interface Sci.*, 2020, **567**, 402-409.
- 6 Y. S. Zhao, Y. Zhang, H. Kong, G. L. Cheng, H. H. Qu and Y. Zhao, *Int. J. Nanomed.*, 2022, **17**, 1-14.
- 7 Z. M. Markovic, M. Labudová, M. Danko, D. Matijasevic, M. Micusík, V. Nádazdy, M. Kovacova, A. Kleinová, Z. Spitalsky, V. Pavlovic, D. D. Milivojevic, M. Medic and B. M. T. Markovic, *ACS Sustainable Chem. Eng.*, 2020, **8**, 16327-16338.
- 8 P. Kuppusamy, S. Kim, S. J. Kim, M. Park and K. D. Song, *J. Saudi Chem. Soc.*, 2024, **28**, 14.
- 9 Y. Lin and S. Y. Cen, *Rsc Advances*, 2022, **12**, 9786-9792.
- 10 Y. Z. Fu, S. J. Zhao, S. L. Wu, L. Huang, T. Xu, X. J. Xing, M. H. Lan and X. Z. Song, *Dyes Pigm.*, 2020, **172**, 8.
- 11 R. K. Mishra, I. N. Pulidindi, E. Kabha and A. Gedanken, *Analytical Methods*, 2016, **8**, 2441-2447.
- 12 G. Absalan, A. Abbaspour, M. Jafari, M. Nekoeinia and H. Ershadifar, *J. Iran. Chem. Soc.*, 2015, **12**, 879-888.
- 13 K. Shrivastava, J. Sahu, P. Maji and D. Sinha, *New J. Chem.*, 2017, **41**, 6685-6692.
